# Supplementary material
Source: PubMed Central journal article supplement (PMC6791411)
Supplement: ehp-127-057001-s001.pdf [file ehp-127-057001-s001.pdf]

**Note to readers with disabilities:** *EHP* strives to ensure that all journal content is accessible to all readers. However, some figures and Supplemental Material published in *EHP* articles may not conform to [508 standards](#) due to the complexity of the information being presented. If you need assistance accessing journal content, please contact [ehp508@niehs.nih.gov](mailto:ehp508@niehs.nih.gov). Our staff will work with you to assess and meet your accessibility needs within 3 working days.

### **Supplemental Material**

#### **Long-Term Exposure to Ambient Ozone and Progression of Subclinical Arterial Disease: The Multi-Ethnic Study of Atherosclerosis and Air Pollution**

Meng Wang, Paul D. Sampson, Lianne E. Sheppard, James H. Stein, Sverre Vedal, and Joel D. Kaufman

#### **Table of Contents**

**Table S1.** Number of participants included in each exam with O<sub>3</sub> exposure data.

**Table S2.** Participant characteristics with coronary artery calcification (CAC) measurement at baseline and during follow-up by study regions. Values provided are mean ± standard deviation for continuous variables or number (%) for categorical variables.

**Table S3.** Characteristics of air pollution distribution at baseline and follow-up period for intima-media thickness of common carotid artery (IMT<sub>CCA</sub>) and carotid plaque (CP) burden.

**Table S4.** Within-site correlation coefficients between long-term air pollution exposures in the study period for intima-media thickness of common carotid artery (IMT<sub>CCA</sub>) and carotid plaque (CP) burden.

**Table S5.** Estimates of the associations between O<sub>3</sub> exposure (3 ppb) and carotid plaque (CP) incidence from models with increasing amounts of adjustment for covariates.

**Table S6.** Main and sensitivity analyses for estimates of the effect of a 3 ppb increase of O<sub>3</sub> exposure on coronary artery calcification (CAC) progression over ten years from models with increasing amounts of covariate adjustment.

**Figure S1.** Description of study design and data characteristics for coronary artery calcification.

**Figure S2.** Concentration-response curves for associations of long-term exposure to O<sub>3</sub> with progression of intima-media thickness of common carotid artery (IMT<sub>CCA</sub>, μm/year) in mixed model (left) and carotid plaque (CP) formation (log-transformed odds ratio) in logistic model (right) smoothed by a natural spline with 4 degree of freedom. Full models were adjusted for age, sex, race/ethnicity, study region, body mass index, smoking status, pack-years, second-hand smoke exposure, alcohol consumption, physical activity, employment status, high-density lipid, total cholesterol, statin use, neighborhood SES index, income, education, systolic and diastolic blood pressure, hypertension, anti-hypertensive medication, diabetes.

## SUPPLEMENTAL MATERIAL

**Table S1. Number of participants included in each exam with O<sub>3</sub> exposure data.**

| Exam          | 1 (2000-01) | 2 (2002-03) | 3 (2004-05) | 4 (2005-07)                              | 5 (2010-12) |
|---------------|-------------|-------------|-------------|------------------------------------------|-------------|
| CAC (N)       | 6374        | 2839        | 2723        | 1569<br>(245 new<br>MESA<br>recruitment) | 3219        |
| IMT and CP(N) | 3147        | -           | -           | 951<br>(245 new<br>MESA<br>recruitment)  | 3276        |

CAC: coronary artery calcification.

IMTCCA: Intima-media thickness of common carotid artery.

CP: Carotid plaque burden.

**Table S2. Participant characteristics with coronary artery calcification (CAC) measurement at baseline and during follow-up by study regions. Values provided are mean  $\pm$  standard deviation for continuous variables or number (%) for categorical variables.**

| Site                                                       | Winston-Salem  | NYC            | Baltimore      | St. Paul       | Chicago        | LA             |
|------------------------------------------------------------|----------------|----------------|----------------|----------------|----------------|----------------|
| <b>O<sub>3</sub> concentrations (ppb)</b>                  |                |                |                |                |                |                |
| Baseline: annual mean 2000                                 | 27.8 $\pm$ 2.4 | 14.7 $\pm$ 1.3 | 22.0 $\pm$ 2.1 | 25.4 $\pm$ 2.3 | 21.4 $\pm$ 1.4 | 16.0 $\pm$ 2.0 |
| Follow-up: all-year mean                                   | 27.9 $\pm$ 2.5 | 14.8 $\pm$ 1.3 | 21.9 $\pm$ 2.2 | 25.6 $\pm$ 1.9 | 21.3 $\pm$ 1.4 | 16.1 $\pm$ 2.2 |
| <b>Number of Participants</b>                              |                |                |                |                |                |                |
| Baseline                                                   | 1039           | 1083           | 1060           | 1030           | 1143           | 1264           |
| Follow-up                                                  | 944            | 975            | 905            | 928            | 1035           | 1076           |
| <b>Follow-up Time (years)</b>                              | 6.6 $\pm$ 3.4  | 7.1 $\pm$ 3.4  | 5.8 $\pm$ 3.6  | 6.9 $\pm$ 3.3  | 6.9 $\pm$ 3.5  | 5.8 $\pm$ 3.6  |
| <b>Average number of follow-up measurements per person</b> | 3 $\pm$ 1      | 3 $\pm$ 1      | 2 $\pm$ 1      | 3 $\pm$ 1      | 3 $\pm$ 1      | 2 $\pm$ 1      |
| <b>Outcomes</b>                                            |                |                |                |                |                |                |
| Mean CAC at baseline (Agatston score)                      | 265 $\pm$ 574  | 233 $\pm$ 560  | 277 $\pm$ 630  | 301 $\pm$ 645  | 229 $\pm$ 469  | 216 $\pm$ 529  |
| Increase in CAC during follow-up (Agatston/year)           | 28 $\pm$ 1.8   | 23 $\pm$ 1.7   | 26 $\pm$ 1.9   | 28 $\pm$ 1.8   | 23 $\pm$ 1.7   | 23 $\pm$ 1.6   |
| <b>Baseline demographics</b>                               |                |                |                |                |                |                |
| Age                                                        | 62 $\pm$ 10    | 62 $\pm$ 10    | 63 $\pm$ 10    | 60 $\pm$ 10    | 62 $\pm$ 10    | 63 $\pm$ 10    |
| Male N(%)                                                  | 488 (47)       | 487 (45)       | 498 (47)       | 505 (49)       | 537 (47)       | 607 (48)       |
| Race/Ethnicity N(%)                                        |                |                |                |                |                |                |
| White                                                      | 561 (54)       | 260 (24)       | 530 (50)       | 587 (57)       | 537 (47)       | 190 (15)       |
| Chinese                                                    | -              | -              | -              | -              | 309 (27)       | 430 (34)       |
| Black                                                      | 468 (45)       | 368 (34)       | 530 (50)       |                | 297 (26)       | 139 (11)       |
| Hispanic                                                   | -              | 455 (42)       | -              | 443 (43)       | -              | 493 (39)       |
| Education N(%)                                             |                |                |                |                |                |                |
| $\leq$ High School                                         | 83 (8)         | 249 (23)       | 117 (11)       | 196 (19)       | 80 (7)         | 417 (33)       |
| High School                                                | 218 (21)       | 206 (19)       | 212 (20)       | 227 (22)       | 91 (8)         | 228 (18)       |
| Some College/Technical                                     | 322 (31)       | 303 (28)       | 318 (30)       | 361 (35)       | 274 (24)       | 329 (26)       |
| College or Graduate                                        | 416 (40)       | 325 (30)       | 413 (39)       | 247 (24)       | 697 (61)       | 291 (23)       |
| Employment N(%)                                            | 662 (64)       | 615 (57)       | 631 (60)       | 718 (70)       | 762 (67)       | 579 (46)       |
| Neighborhood SES index                                     | -0.7 $\pm$ 4.6 | 0.4 $\pm$ 7.9  | -0.2 $\pm$ 4.5 | 0.2 $\pm$ 3.3  | -6.4 $\pm$ 6.7 | 0.6 $\pm$ 5.9  |
| Income (USDx1000)                                          | 56 $\pm$ 34    | 43 $\pm$ 31    | 52 $\pm$ 34    | 45 $\pm$ 30    | 71 $\pm$ 40    | 36 $\pm$ 31    |
| <b>Baseline risk factors</b>                               |                |                |                |                |                |                |
| Body mass index (kg/m <sup>2</sup> )                       | 29 $\pm$ 5     | 28 $\pm$ 5     | 30 $\pm$ 6     | 29 $\pm$ 5     | 26 $\pm$ 5     | 27 $\pm$ 5     |
| Smoking Status                                             |                |                |                |                |                |                |
| Never                                                      | 416 (40)       | 531 (49)       | 456 (43)       | 433 (42)       | 549 (48)       | 771 (61)       |
| Former                                                     | 447 (43)       | 379 (35)       | 445 (42)       | 412 (40)       | 446 (39)       | 354 (28)       |
| Current                                                    | 177 (17)       | 173 (16)       | 159 (15)       | 185 (18)       | 149 (13)       | 139 (11)       |
| Pack-years smoking                                         | 14 $\pm$ 24    | 10 $\pm$ 18    | 14 $\pm$ 23    | 12 $\pm$ 21    | 12 $\pm$ 23    | 7 $\pm$ 15     |
| Second-hand smoking N(%)                                   | 594 (57)       | 475 (44)       | 532 (50)       | 629 (61)       | 592 (52)       | 363 (29)       |

|                                                   |          |          |          |          |          |          |
|---------------------------------------------------|----------|----------|----------|----------|----------|----------|
| Physical activity N(%)                            |          |          |          |          |          |          |
| Q1                                                | 253 (24) | 262 (24) | 288 (27) | 263 (26) | 205 (18) | 415 (33) |
| Q2                                                | 315 (30) | 248 (23) | 240 (23) | 262 (25) | 285 (25) | 383 (30) |
| Q3                                                | 234 (23) | 254 (23) | 243 (23) | 249 (24) | 316 (28) | 268 (21) |
| Q4                                                | 236 (23) | 318 (29) | 289 (27) | 256 (25) | 337 (29) | 198 (16) |
| Systolic Blood Pressure (mmHg)                    | 133±21   | 123±20   | 128±21   | 122±20   | 123±21   | 127±22   |
| Diastolic blood pressure (mmHg)                   | 74±10    | 73±10    | 72±10    | 70±10    | 72±10    | 72±10    |
| Hypertension <sup>a</sup>                         | 582 (56) | 509 (47) | 541 (51) | 350 (34) | 434 (38) | 544 (43) |
| High-density lipid (mg/dl) <sup>b</sup>           | 50±15    | 53±15    | 52±15    | 49±14    | 54±16    | 49±14    |
| Total Cholesterol (mg/dl) <sup>b</sup>            | 189±33   | 194±35   | 192±35   | 200±38   | 195±33   | 193±34   |
| Statin Use N(%) <sup>c</sup>                      | 166 (16) | 173 (16) | 201 (19) | 124 (12) | 160 (14) | 152 (12) |
| Anti-hypertensive medication N(%) <sup>c</sup>    | 456 (44) | 453 (42) | 478 (45) | 292 (28) | 373 (33) | 420 (33) |
| Diabetes N(%) <sup>d</sup>                        |          |          |          |          |          |          |
| Normal                                            | 790 (76) | 780 (72) | 763 (72) | 783 (76) | 903 (79) | 847 (67) |
| Impaired fasting glucose                          | 125 (12) | 152 (14) | 159 (15) | 134 (13) | 137 (12) | 202 (16) |
| Diabetic                                          | 125 (12) | 152 (14) | 138 (13) | 113 (11) | 103 (9)  | 215 (17) |
| Family history of premature CVD N(%) <sup>e</sup> | 315 (30) | 271 (25) | 339 (32) | 312 (30) | 280 (25) | 274 (22) |
| Fibrinogen (mg/dL)                                | 339±72   | 364±79   | 348±75   | 351±73   | 337±72   | 344±69   |
| C-reactive protein (mg/dL)                        | 4.4±6.5  | 3.6±5    | 4.3±6.6  | 3.9±5.4  | 3.2±5.9  | 3.4±5.6  |
| Creatinine (mg/dL)                                | 1±0.3    | 1±0.3    | 1±0.4    | 1±0.3    | 0.9±0.2  | 0.9±0.3  |

<sup>a</sup>Hypertension was defined as systolic blood pressure at least 140 mm Hg, diastolic blood pressure at least 90 mm Hg, or reported use of antihypertensive medication.

<sup>b</sup>Plasma lipid measurements for high-density lipid and total cholesterol.

<sup>c</sup>Medication use was defined as any positive report of a statin and/or antihypertensive medication use on the medication inventory for the participants at each of the five clinical exams.

<sup>d</sup>Diabetes mellitus was defined as fasting glucose >125 mg/dl or the use of hypoglycemic medications. Among those not reporting use of hypoglycemic medications, we defined Impaired fasting glucose between 100 and 125mg/dl and normal fasting glucose as fasting blood glucose less than 100 mg/dl.

<sup>e</sup>Family history of premature cardiovascular disease was defined as myocardial infarction/heart attack, stroke/brain attack, or cardiovascular procedure (coronary bypass or balloon angioplasty) in a female primary relative (parent, sibling, or child) aged <65 years or a male primary relative aged <55 years) Outcome, demographic covariates and risk factors were available for all the participants.

**Table S3. Characteristics of air pollution distribution at baseline and follow-up period for intima-media thickness of common carotid artery (IMT<sub>CCA</sub>) and carotid plaque (CP) burden.**

|                                         | Mean | STD  | Min  | 25%  | 50%  | 75%  | Max   |
|-----------------------------------------|------|------|------|------|------|------|-------|
| <b>Baseline</b>                         |      |      |      |      |      |      |       |
| O <sub>3</sub> Long-term                | 21.0 | 5.0  | 10.5 | 16.0 | 21.2 | 25.1 | 42.3  |
| O <sub>3</sub> warm season <sup>a</sup> | 27.5 | 4.4  | 15.4 | 25.2 | 28.1 | 30.6 | 47.5  |
| O <sub>3</sub> 1-year <sup>b</sup>      | 21.0 | 5.0  | 10.5 | 16.0 | 21.2 | 25.1 | 42.3  |
| NO <sub>x</sub> all years               | 53.0 | 32.7 | 8.7  | 25.6 | 41.9 | 78.1 | 267.1 |
| PM <sub>2.5</sub> all years             | 16.5 | 2.8  | 10.9 | 15.0 | 16.0 | 17.4 | 27.9  |
| <b>Follow-up</b>                        |      |      |      |      |      |      |       |
| O <sub>3</sub> all years                | 21.7 | 4.1  | 10.8 | 18.7 | 22.3 | 24.2 | 41.7  |
| O <sub>3</sub> warm season <sup>a</sup> | 27.5 | 4.4  | 15.2 | 25.1 | 28.1 | 30.6 | 47.6  |
| O <sub>3</sub> 1-year <sup>b</sup>      | 22.8 | 4.6  | 11.1 | 18.9 | 23.3 | 26.1 | 44.3  |
| NO <sub>x</sub> Long-term               | 39.3 | 25.2 | 6.6  | 20.2 | 31.8 | 52.7 | 246.2 |
| PM <sub>2.5</sub> all years             | 13.6 | 2.4  | 8.6  | 12.6 | 13.5 | 14.8 | 22.3  |

<sup>a</sup>Long-term ozone exposure between April and September.

<sup>b</sup>1-year average prior to each exam.

**Table S4. Within-site correlation coefficients<sup>a</sup> between long-term air pollution exposures in the study period for intima-media thickness of common carotid artery (IMT<sub>CCA</sub>) and carotid plaque (CP) burden.**

|                             | O <sub>3</sub> all years | O <sub>3</sub> warm season | O <sub>3</sub> 1-year | NO <sub>x</sub> all years | PM <sub>2.5</sub> all years |
|-----------------------------|--------------------------|----------------------------|-----------------------|---------------------------|-----------------------------|
| O <sub>3</sub> all years    | 1.00                     |                            |                       |                           |                             |
| O <sub>3</sub> warm season  | 0.71                     | 1.00                       |                       |                           |                             |
| O <sub>3</sub> 1-year       | 0.91                     | 0.61                       | 1.00                  |                           |                             |
| NO <sub>x</sub> all years   | -0.42                    | -0.27                      | -0.46                 | 1.00                      |                             |
| PM <sub>2.5</sub> all years | -0.29                    | -0.17                      | -0.42                 | 0.67                      | 1.00                        |

<sup>a</sup>Within-Site: Calculated after subtracting the city-specific mean from each observation.

**Table S5. Estimates of the associations between O<sub>3</sub> exposure (3 ppb) and carotid plaque (CP) incidence from models with increasing amounts of adjustment for covariates.**

| Staged models | Odds Ratio (95% CI)<br>CP incidence |
|---------------|-------------------------------------|
| Base          | 1.3 (1.1, 1.4)                      |
| Moderate      | 1.2 (1.1, 1.4)                      |
| Full          | 1.2 (1.1, 1.4)                      |
| Extended      | 1.2 (1.1, 1.4)                      |

Base model includes age, sex, race/ethnicity, study region.

Moderate model= Base model + body mass index, smoking status, pack-years, second-hand smoke exposure, alcohol consumption, physical activity, employment status, high-density lipid, total cholesterol, statin use.

Full model (primary analysis) = Moderate model + neighborhood SES index, income, education, systolic and diastolic blood pressure, hypertension, anti-hypertensive medication, diabetes; Full model is the primary model for report in the main text and discussion.

Extended model = Full model+family history of premature CVD, fibrinogen, c-reactive protein, creatinine.



**Table S6. Main and sensitivity analyses for estimates of the effect of a 3 ppb increase of O<sub>3</sub> exposure on coronary artery calcification (CAC) progression over ten years from models with increasing amounts of covariate adjustment.**

|                                          | Change of CAC ten years<br>(Agatston units, 95% CI) |
|------------------------------------------|-----------------------------------------------------|
| <b>Main Analyses</b>                     |                                                     |
| Base                                     | -2 (-12, 8)                                         |
| Moderate                                 | -8 (-18, 2)                                         |
| Full                                     | -8 (-18, 2)                                         |
| Extended                                 | -8 (-19, 2)                                         |
| <b>Sensitivity Analyses</b>              |                                                     |
| O <sub>3</sub> warm seasons <sup>‡</sup> | -6 (-15, 4)                                         |
| O <sub>3</sub> 1-year mean               | -12 (-19, 4)                                        |
| Adjust for NO <sub>x</sub>               | -18 (-38, 3)                                        |
| Adjust for PM <sub>2.5</sub>             | -22 (-41, 1)                                        |

Main analyses (within-city IQR of O<sub>3</sub> exposure = 3ppb):

Base model includes age, sex, race/ethnicity, study region and CT scanner types.

Moderate model= Base model + body mass index, smoking status, pack-years, second-hand smoke exposure, alcohol consumption, physical activity, employment status, high-density lipid, total cholesterol, statin use.

Full model = Moderate model + neighborhood SES index, income, education, systolic and diastolic blood pressure, hypertension, anti-hypertensive medication, diabetes; Full model is the primary model for report in the main text and discussion.

Extended model = Full model+family history of premature CVD, fibrinogen, c-reactive protein, creatinine  
Sensitivity analyses: covariates in the sensitivity analyses are the same as those in the full model of the main analyses.

Long-term ozone exposure between April and September.

1-year average prior to exams.

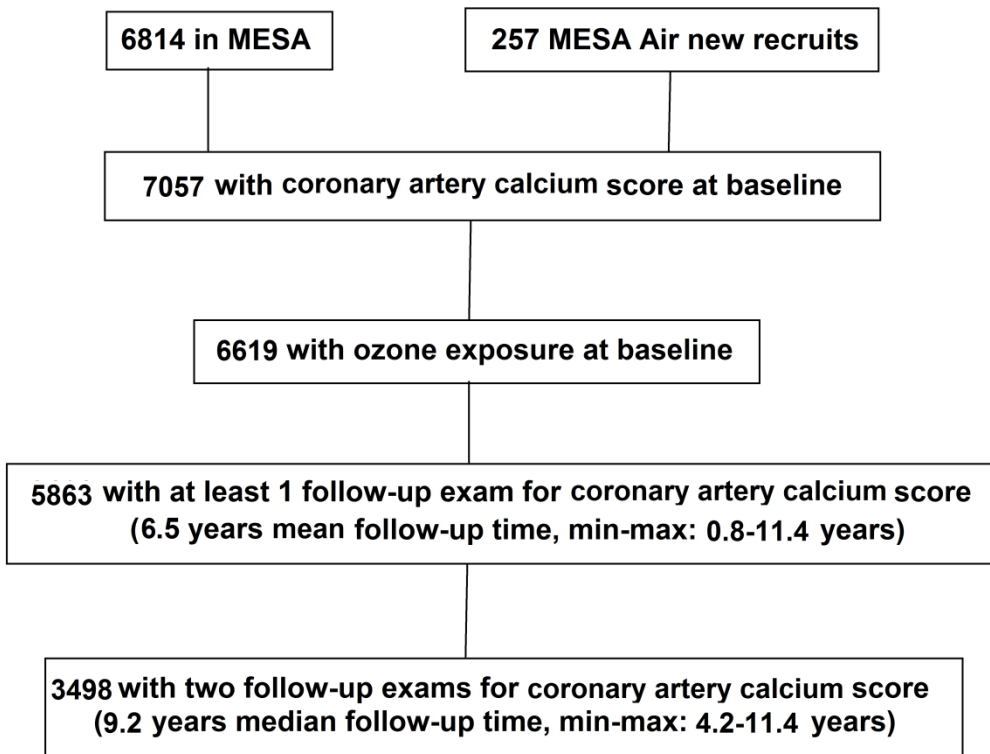

**Figure S1.** Description of study design and data characteristics for coronary artery calcification.

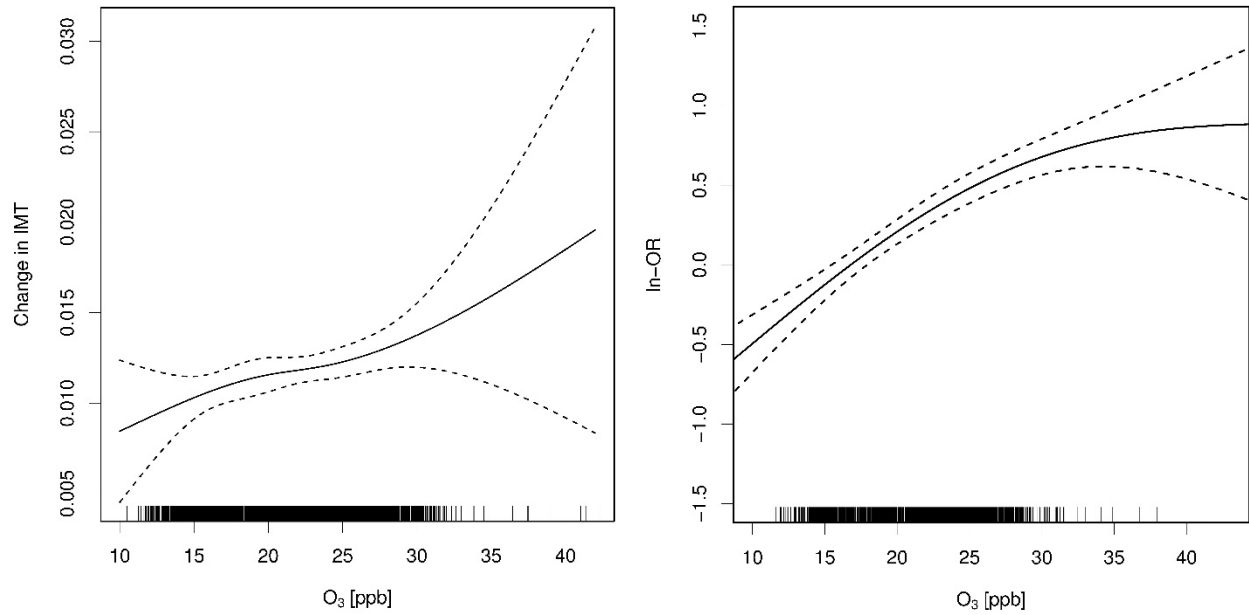

**Figure S2.** Concentration-response curves for associations of long-term exposure to O<sub>3</sub> with progression of intima-media thickness of common carotid artery (IMT<sub>CCA</sub>,  $\mu\text{m}/\text{year}$ ) in mixed model (left) and carotid plaque (CP) formation (log-transformed odds ratio) in logistic model (right) smoothed by a natural spline with 4 degree of freedom. Full models were adjusted for age, sex, race/ethnicity, study region, body mass index, smoking status, pack-years, second-hand smoke exposure, alcohol consumption, physical activity, employment status, high-density lipid, total cholesterol, statin use, neighborhood SES index, income, education, systolic and diastolic blood pressure, hypertension, anti-hypertensive medication, diabetes.
