# Supplementary material
Source: PubMed Central journal article supplement (PMC6791411)
Supplement: ehp-127-057001-s002.pdf [file ehp-127-057001-s002.pdf]

**Note to readers with disabilities:** *EHP* strives to ensure that all journal content is accessible to all readers. However, some figures and Supplemental Material published in *EHP* articles may not conform to [508 standards](#) due to the complexity of the information being presented. If you need assistance accessing journal content, please contact [ehp508@niehs.nih.gov](mailto:ehp508@niehs.nih.gov). Our staff will work with you to assess and meet your accessibility needs within 3 working days.

### **Supplemental Material**

#### **Long-Term Exposure to Ambient Ozone and Progression of Subclinical Arterial Disease: The Multi-Ethnic Study of Atherosclerosis and Air Pollution**

Meng Wang, Paul D. Sampson, Lianne E. Sheppard, James H. Stein, Sverre Vedal, and Joel D. Kaufman

#### **Table of Contents**

**Table S1.** Number of participants included in each exam with O<sub>3</sub> exposure data.

**Table S2.** Participant characteristics with coronary artery calcification (CAC) measurement at baseline and during follow-up by study regions. Values provided are mean ± standard deviation for continuous variables or number (%) for categorical variables.

**Table S3.** Characteristics of air pollution distribution at baseline and follow-up period for intima-media thickness of common carotid artery (IMT<sub>CCA</sub>) and carotid plaque (CP) burden.

**Table S4.** Within-site correlation coefficients between long-term air pollution exposures in the study period for intima-media thickness of common carotid artery (IMT<sub>CCA</sub>) and carotid plaque (CP) burden.

**Table S5.** Estimates of the associations between O<sub>3</sub> exposure (3 ppb) and carotid plaque (CP) incidence from models with increasing amounts of adjustment for covariates.

**Table S6.** Main and sensitivity analyses for estimates of the effect of a 3 ppb increase of O<sub>3</sub> exposure on coronary artery calcification (CAC) progression over ten years from models with increasing amounts of covariate adjustment.

**Figure S1.** Description of study design and data characteristics for coronary artery calcification.

**Figure S2.** Concentration-response curves for associations of long-term exposure to O<sub>3</sub> with progression of intima-media thickness of common carotid artery (IMT<sub>CCA</sub>, μm/year) in mixed model (left) and carotid plaque (CP) formation (log-transformed odds ratio) in logistic model (right) smoothed by a natural spline with 4 degree of freedom. Full models were adjusted for age, sex, race/ethnicity, study region, body mass index, smoking status, pack-years, second-hand smoke exposure, alcohol consumption, physical activity, employment status, high-density lipid, total cholesterol, statin use, neighborhood SES index, income, education, systolic and diastolic blood pressure, hypertension, anti-hypertensive medication, diabetes.
